# Supplementary material for: Analysis of Sequence Divergence in Mammalian ABCGs Predicts a Structural Network of Residues That Underlies Functional Divergence
Source: MDPI journal article supplement (doi:10.3390/ijms22063012), 2021-03-16
Supplement: s1 [file s1]

(ABCG1), (ABCG4), (ABCG2), (ABCG5), (ABCG8)

| Alignment position | ABCG2 | ABCG5 | ABCG8 | References                | Summary of recorded effects |
|--------------------|-------|-------|-------|---------------------------|-----------------------------|
| 362                | K47   | S48   | D57   | Khunweeraphong et al 2017 | ABCG2: protein immature     |
| 749                | H267  | C274  | L294  |                           |                             |
| 909                | P392  | K383  | L414  |                           |                             |
| 1192               | K653  | D646  | Q667  |                           |                             |

(ABCG1, ABCG4), (ABCG2), (ABCG5, ABCG8)

| Alignment position | ABCG2 | ABCG5 | ABCG8 | References                | Summary of recorded effects                                                                                           |
|--------------------|-------|-------|-------|---------------------------|-----------------------------------------------------------------------------------------------------------------------|
| 539                | N139  | T147  | T166  | Khunweeraphong et al 2017 | ABCG2: diminished mature expression, reduced mitoxantrone transport. Elsewhere, multiple nonsense mutations of ABCG5. |
| 676                | T194  | V201  | V221  |                           |                                                                                                                       |
| 683                | I201  | L208  | L228  |                           |                                                                                                                       |
| 729                | Y247  | S254  | S274  |                           |                                                                                                                       |
| 755                | A273  | M280  | M300  |                           |                                                                                                                       |
| 770                | N288  | S295  | S315  |                           |                                                                                                                       |
| 780                | I298  | T305  | T325  |                           |                                                                                                                       |
| 928                | A411  | F402  | F433  |                           |                                                                                                                       |
| 957                | C438  | P431  | P460  |                           |                                                                                                                       |
| 976                | K452  | R446  | R475  |                           |                                                                                                                       |
| 986                | S461  | D455  | D484  | Haider et al 2015         | ABCG2: protein immature                                                                                               |
| 988                | Y463  | L457  | L486  |                           |                                                                                                                       |
| 1103               | I573  | F567  | F595  |                           |                                                                                                                       |

(ABCG1, ABCG4), (ABCG2), (ABCG5), (ABCG8)

| Alignment position | ABCG2 | ABCG5 | ABCG8 | References                                             | Summary of recorded effects                                                      |
|--------------------|-------|-------|-------|--------------------------------------------------------|----------------------------------------------------------------------------------|
| 514                | G122  | S130  | A149  | Tamura et al 2006, Tamura et al 2007, Deppe et al 2014 | ABCG2: reduced porphyrin transport, reduced resistance (MX, Dox, DNR, etoposide) |
| 680                | M198  | A205  | V225  |                                                        |                                                                                  |
| 684                | T202  | Q209  | W229  |                                                        |                                                                                  |
| 730                | S248  | E255  | D275  |                                                        |                                                                                  |
| 739                | T257  | A264  | L284  |                                                        |                                                                                  |
| 768                | A286  | E293  | R313  | Polgar et al 2009                                      | ABCG2: No expression with R383G background                                       |
| 784                | S302  | T309  | R329  |                                                        |                                                                                  |
| 901                | S384  | V375  | Q406  |                                                        |                                                                                  |
| 912                | S395  | V386  | L417  | Miettinen et al 2006                                   | ABCG8: allelic variant                                                           |
| 914                | A397  | T388  | I419  |                                                        |                                                                                  |
| 918                | V401  | Q392  | E423  |                                                        |                                                                                  |

| 919                | T402  | N393  | A424  | Cox et al 2018, Ni et al 2010, Polgar et al 2010                         | ABCG2: reduced transport                                                                                 |
|--------------------|-------|-------|-------|--------------------------------------------------------------------------|----------------------------------------------------------------------------------------------------------|
| 941                | G422  | A415  | S444  |                                                                          |                                                                                                          |
| 953                | T434  | V427  | G456  | Heyes et al 2018, Toyoda et al 2019                                      | ABCG2: transport abolished                                                                               |
| 954                | T435  | G428  | A457  |                                                                          |                                                                                                          |
| 959                | S440  | T433  | N462  | Cox et al 2018                                                           | ABCG2: reduced transport (MX, Pheo A)                                                                    |
| 960                | S441  | G434  | V463  | Nakagawa et al 2008, Tamura et al 2006, 2007, Sjöstedt et al 2017        | ABCG2: reduced expression, no porphyrin transport, reduced transport (Lucifer yellow, Estrone-1-Sulfate) |
| 961                | V442  | M435  | I464  |                                                                          |                                                                                                          |
| 984                | Y459  | S453  | L482  |                                                                          |                                                                                                          |
| 985                | I460  | Q454  | E483  |                                                                          |                                                                                                          |
| 993                | S468  | Q462  | P491  |                                                                          |                                                                                                          |
| 1005               | S476  | H470  | G499  | Heyes et al 2018, Toyoda et al 2019                                      | ABCG2: transport abolished                                                                               |
| 1011               | R482  | S475  | H504  | Various                                                                  | ABCG2: gain of function; transport of non-native substrates                                              |
| 1050               | S521  | E514  | R543  | Lu et al 2001                                                            | ABCG8: allelic variant                                                                                   |
| 1063               | V533  | P527  | T555  |                                                                          |                                                                                                          |
| 1072               | T542  | L536  | N564  |                                                                          |                                                                                                          |
| 1073               | I543  | L537  | A565  |                                                                          |                                                                                                          |
| 1075               | F545  | I539  | Y567  | Cox et al 2018                                                           | ABCG2: reduced transport (MX, Pheo A)                                                                    |
| 1076               | V546  | A540  | N568  | Xavier et al 2020                                                        | ABCG5: reduced ATPase with CHS                                                                           |
| 1077               | F547  | G541  | S569  |                                                                          |                                                                                                          |
| 1094               | W564  | P558  | V586  | Haider et al 2015                                                        |                                                                                                          |
| 1104               | P574  | Q568  | L596  | Berge et al 2000, Li et al 2001, Lu et al 2001                           | ABCG8: allelic variant                                                                                   |
| 1163               | G625  | R619  | P639  |                                                                          |                                                                                                          |
| Totally conserved  |       |       |       |                                                                          |                                                                                                          |
| Alignment position | ABCG2 | ABCG5 | ABCG8 | References                                                               | Summary of recorded effects                                                                              |
| 224                | M1    | M1    | M1    |                                                                          |                                                                                                          |
| 359                | Y44   | Y45   | Y54   | Abellan et al 2010, Krawczyk et al 2011, Hubacek et al 2001, many others | ABCG8                                                                                                    |
| 361                | V46   | V47   | V56   |                                                                          |                                                                                                          |
| 462                | I78   | I84   | I103  |                                                                          |                                                                                                          |
| 469                | G80   | G86   | G105  |                                                                          |                                                                                                          |
| 472                | G83   | G89   | G108  |                                                                          |                                                                                                          |
| 474                | G85   | G91   | G110  |                                                                          |                                                                                                          |

|     |      |      |      |                                                 |                                                |
|-----|------|------|------|-------------------------------------------------|------------------------------------------------|
| 495 | G104 | G111 | G130 |                                                 |                                                |
| 500 | N109 | N116 | N135 |                                                 |                                                |
| 501 | G110 | G117 | G136 |                                                 |                                                |
| 518 | Q126 | Q134 | Q153 |                                                 |                                                |
| 520 | D128 | D136 | D155 |                                                 |                                                |
| 534 | L134 | L142 | L161 |                                                 |                                                |
| 535 | T135 | T143 | T162 |                                                 |                                                |
| 536 | V136 | V144 | V163 |                                                 |                                                |
| 538 | E138 | E146 | E165 | Khunweeraphong et al 2017, Keller et al 2011    | ABCG2: protein immature, ABCG5: sitosterolemia |
| 544 | A144 | A152 | A171 |                                                 |                                                |
| 549 | L146 | L154 | L173 |                                                 |                                                |
| 650 | L168 | L175 | L195 | Heimer et al 2002                               | ABG8: sitosterolemia                           |
| 652 | L170 | L177 | L197 |                                                 |                                                |
| 669 | S187 | S194 | S214 | Nakanishi et al 2003                            | ABCG2: reduced transport (DNR)                 |
| 671 | G189 | G196 | G216 |                                                 |                                                |
| 673 | R191 | R198 | R218 |                                                 |                                                |
| 675 | R193 | R200 | R220 |                                                 |                                                |
| 678 | I196 | I203 | I223 |                                                 |                                                |
| 682 | L200 | L207 | L227 |                                                 |                                                |
| 686 | P204 | P211 | P231 | Lee et al 2001, Lu et al 2001                   |                                                |
| 692 | D210 | D217 | D237 |                                                 |                                                |
| 693 | E211 | E218 | E238 |                                                 |                                                |
| 694 | P212 | P219 | P239 |                                                 |                                                |
| 695 | T213 | R220 | T240 |                                                 | Walker B motif                                 |
| 697 | G215 | G222 | G242 |                                                 |                                                |
| 698 | L216 | L223 | L243 |                                                 |                                                |
| 699 | D217 | D224 | D244 |                                                 |                                                |
| 718 | R236 | R243 | R263 | Berge et al 2000, Lu et al 2001, Lee et al 2001 | ABCG5: Nonsense mutations                      |
| 725 | H243 | H250 | H270 |                                                 |                                                |
| 726 | Q244 | Q251 | Q271 |                                                 | ABCG8: Nonsense                                |
| 727 | P245 | P252 | P272 |                                                 |                                                |
| 732 | F250 | F257 | F277 |                                                 |                                                |
| 735 | F253 | F260 | F280 |                                                 |                                                |
| 736 | D254 | D261 | D281 |                                                 |                                                |
| 744 | G262 | G269 | G289 | Keller et al 2011, Niu et al 2010               | ABCG5: sitosterolemia                          |
| 750 | G268 | G275 | G295 | Heyes et al 2018                                | ABCG2: allelic variant                         |
| 763 | G281 | G288 | G308 |                                                 |                                                |
| 766 | C284 | C291 | C311 |                                                 |                                                |
| 771 | N289 | N296 | N316 |                                                 |                                                |
| 772 | P290 | P297 | P317 |                                                 |                                                |
| 774 | D292 | D299 | D319 |                                                 |                                                |
| 775 | F293 | F300 | F320 |                                                 |                                                |

|      |      |      |      |                                                                |                                               |
|------|------|------|------|----------------------------------------------------------------|-----------------------------------------------|
| 900  | R383 | R374 | R405 | Polgar et al 2009,<br>Khunweeraphong et al 2017, Lu et al 2001 | ABCG2: poor expression, salt bridge with E458 |
| 907  | G390 | G381 | G412 |                                                                | ABCG8: Nonsense                               |
| 949  | L430 | L423 | L452 |                                                                |                                               |
| 983  | E458 | E452 | E481 | Khunweeraphong et al 2017                                      | ABCG2: poor expression, salt bridge with R383 |
| 989  | Y464 | Y458 | Y487 |                                                                |                                               |
| 1009 | P480 | P473 | P502 | Cox et al 2018, Ni et al 2011                                  | ABCG2: WT-like                                |
| 1023 | Y494 | Y487 | Y516 | Cox et al 2018                                                 | ABCG2: reduced transport (MX)                 |
| 1035 | F506 | F499 | F528 |                                                                |                                               |
| 1054 | L525 | L518 | L547 |                                                                |                                               |
| 1083 | G553 | G547 | G575 | Pandit et al 2006,<br>Buch et al 2007                          |                                               |
| 1118 | G588 | G582 | G610 |                                                                |                                               |
| 1171 | L633 | L627 | L647 | Cox et al 2018                                                 | ABCG2: protein immature                       |
